# Supplementary material for: The synthesis of a hyperbranched star polymeric ionic liquid and its application in a polymer electrolyte
Source: Royal Society of Chemistry journal article supplement (doi:10.1039/c7py00499k), 2017-01-01
Supplement: c7py00499k1.pdf [file c7py00499k1.pdf]

# The Synthesis of Hyperbranched Star Polymeric Ionic Liquid and the Application in Polymer Electrolyte

*Ailian Wang<sup>a</sup>, Hao Xu<sup>a</sup>, Xu Liu<sup>a</sup>, Rui Gao<sup>b</sup>, Shi Wang<sup>a</sup>, Qian Zhou<sup>a</sup>, Jie Chen<sup>a</sup>,*

*Xiangfeng Liu<sup>b</sup>, Liaoyun Zhang<sup>a</sup>,\**

<sup>a</sup> College of Chemistry and Chemical Engineering, University of Chinese Academy of Sciences, Beijing 100049, China

<sup>b</sup> College of Materials Science and Opto-Electronic Technology, University of Chinese Academy of Sciences, Beijing 100049, China

# Lithium-ion transference number

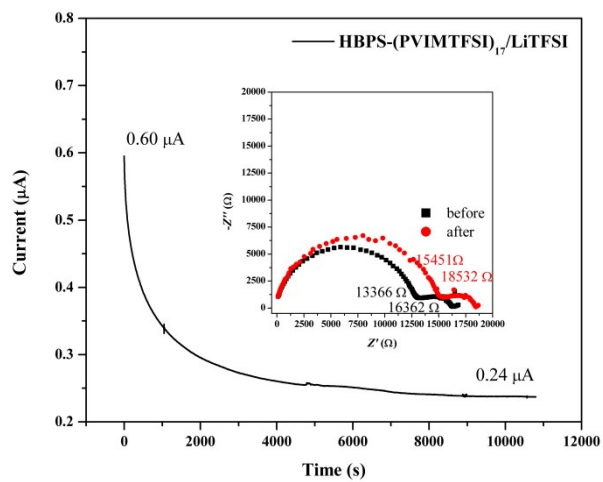

Figure S 1 Chronoamperometry curves and impedance spectra of the HBPS-(PVIMTFSI)<sub>17</sub>/LiTFSI electrolyte obtained at 30°C
